# Supplementary material
Source: PubMed Central journal article supplement (PMC2903445)

Supplementary Material – Sammond et. al.

Table S.1: Additional second site suppressor designs for  $\text{Go}\alpha_{11}:\text{GoLoco}$   
Residue numbers above 500 are from GoLoco. The energy terms are described in Table 1 of the main text.

| LJ_atr | LJ_rep | Solv | Hb   | Elec | Total | dGchn1 | dGchn2 | mutations |       |       |       |       |       |       |       |
|--------|--------|------|------|------|-------|--------|--------|-----------|-------|-------|-------|-------|-------|-------|-------|
| 3.3    | -4.2   | -3.6 | -0.6 | 0.3  | -4.8  | -2.7   | -2.8   | L39M      | W211M | I212L | C214A | F215W | V501T | L504F | Q508S |
| 2.1    | 5.4    | -3   | -1.1 | 0.3  | 3.7   |        |        | V501T     | L504F | Q508S |       |       |       |       |       |
| 6.1    | -3.7   | -4.1 | -0.6 | 0.3  | -2    | 0.8    | -3.5   | W211L     | L500M | V501A | L504I | Q508S |       |       |       |
| 1.7    | 0.8    | -2.2 | 0.4  | 0    | 0.9   |        |        | W211L     |       |       |       |       |       |       |       |
| 6      | -3.8   | -2.9 | -0.6 | -0.2 | -1.5  | 0.4    | -2.5   | W211L     | F215W | L500M | V501A | L504H | Q508S |       |       |
| 2.5    | 7.8    | -1.4 | 0.4  | 0    | 9.4   |        |        | W211L     | F215W |       |       |       |       |       |       |
| 0.3    | 0.1    | -0.4 | 0    | 0    | 0     | -1.3   | -2.1   | N256W     | K257D | W258G | I497G | L500M |       |       |       |
| 1.2    | 0      | -0.3 | 0    | 0    | 0.9   |        |        | I497G     | L500M |       |       |       |       |       |       |
| -0.2   | -0.1   | -0.3 | 0    | -0.1 | -0.8  | 0.1    | -0.1   | V72F      | E116L | L518D |       |       |       |       |       |
| 1.1    | 0.1    | 0.6  | 0    | 0.2  | 1.9   |        |        | L518D     |       |       |       |       |       |       |       |
| -0.2   | -0.1   | -0.3 | 0    | -0.1 | -0.8  | 0.1    | 0      | V72F      | E116L | L518N |       |       |       |       |       |
| 0.9    | -0.1   | 0.9  | 0    | 0    | 1.6   |        |        | L518N     |       |       |       |       |       |       |       |
| 0      | 0.6    | -0.3 | -0.9 | -0.5 | -1.1  | -2.8   | -1     | K70R      | A71F  | V72A  | E116L | L518P |       |       |       |
| 2.4    | -0.1   | -1.3 | 0    | 0    | 0.9   |        |        | L518P     |       |       |       |       |       |       |       |
| -0.1   | -0.2   | -0.1 | 0    | 0.2  | -0.3  | -0.5   | 0.7    | S252L     | L503V |       |       |       |       |       |       |
| 1.5    | 0      | 0.2  | 0    | 0    | 1.6   |        |        | L503V     |       |       |       |       |       |       |       |
| -1.7   | 0      | -0.2 | 0    | 0.2  | -1.7  | -1.9   | 0.6    | D251E     | S252V | L500M |       |       |       |       |       |
| -1.4   | 14     | -0.6 | 0    | 0.2  | 12.3  |        |        | D251E     | S252V |       |       |       |       |       |       |
| 5.6    | -2.2   | -5.5 | 0.8  | 0.8  | -0.6  | -2     | -0.7   | N76D      | Q79S  | D523Q |       |       |       |       |       |
| -0.6   | 3.7    | 1.3  | -0.1 | 0.7  | 4.9   |        |        | D523Q     |       |       |       |       |       |       |       |
| 2.9    | -2.5   | -1.9 | -1.2 | 0.4  | -2.3  | 0.1    | -2.2   | L39M      | W211M | F215W | L500M | V501T | L504Y | Q508S |       |
| 4.5    | 1.5    | -2.2 | 0.4  | 0    | 4.2   |        |        | L39M      | W211M | F215W |       |       |       |       |       |
| 0.7    | 0.6    | -0.6 | -0.8 | -0.8 | -0.9  | -2.3   | 0.4    | E238L     | M240K | R242E | E245V | S246M | V507T |       |       |
| 0.4    | 0.2    | 0.8  | 0    | -0.2 | 1.2   |        |        | V507T     |       |       |       |       |       |       |       |
| 6.9    | -2.1   | -4.3 | -1.2 | 0.4  | -0.3  | -0.4   | -2.8   | W211M     | F215W | V501T | L504V | Q508S |       |       |       |
| 1.7    | 3      | -1.5 | 0.3  | 0    | 3.5   |        |        | W211M     | F215W |       |       |       |       |       |       |
| 3.4    | -2.2   | -1.7 | -0.5 | -0.2 | -1.2  | -1     | -3.3   | S206V     | W211S | I212L | C214A | V501D | Q508M |       |       |
| 2.3    | 1      | -2.3 | 0    | -0.2 | 0.8   |        |        | V501D     | Q508M |       |       |       |       |       |       |
| -5     | 2.2    | 4    | -1.8 | -0.5 | -1.1  | 0.7    | 0.2    | K46D      | Q508R |       |       |       |       |       |       |
| -2.6   | 22.6   | 2.4  | 0.1  | 0    | 22.4  |        |        | Q508R     |       |       |       |       |       |       |       |
| 0.3    | 0.9    | -3   | -1   | 0.2  | -2.6  | -0.4   | 0.4    | E245G     | S246M | V507I | Q508M |       |       |       |       |
| -1     | 3.5    | -2.4 | 0    | 0.3  | 0.3   |        |        | V507I     | Q508M |       |       |       |       |       |       |
| 0.9    | 1.1    | -2.1 | 0.3  | -0.1 | 0     | -0.2   | 0.9    | V72F      | E116L | L518F |       |       |       |       |       |
| 0.8    | 0.3    | 0.4  | 0    | 0.1  | 1.5   |        |        | L518F     |       |       |       |       |       |       |       |
| -2.5   | -0.2   | 3    | -0.7 | -0.4 | -0.80 | 1      | 0.8    | K248R     | S252M | E502K | L503F |       |       |       |       |
| 1.6    | -0.2   | 0.4  | 0    | 0    | 1.80  |        |        | E502K     | L503F |       |       |       |       |       |       |
| 0.4    | -3.9   | 1.3  | 0    | 0    | -2.20 | -0.4   | -1.6   | I85L      | E528D | F529Y |       |       |       |       |       |
| 0      | 7.8    | 1.3  | 0    | 0    | 9.10  |        |        | I85L      |       |       |       |       |       |       |       |

Table S.2: Additional second site suppressor designs for E6AP:UbcH7

Residue numbers above 600 are from E6AP

The energy terms are described in table 1 of the main text.

| LJ_atr | LJ_rep | Solv | Hb   | Elec | Total | dGchn1 | dGchn2 |                                      |
|--------|--------|------|------|------|-------|--------|--------|--------------------------------------|
| -0.2   | -1.2   | -2.2 | 0.1  | 1.7  | -1.9  | -1.6   | -6     | Q637A D641Y K96R T99W                |
| -1.7   | 18.1   | -2.1 | 0.1  | 1.1  | 15.5  | -1.3   | 0      | Q637W D641Y                          |
| -6     | -7.5   | 1    | 0.6  | 1    | -10.9 | -7.6   | -2     | S638A D641Y M653S R6K F63W P97K A98I |
| -6.3   | 86.4   | 6.4  | 0.1  | -0.5 | 86.2  | 0      | -2.4   | R6K F63W P97K A98I                   |
| -2.1   | 1.2    | 0.4  | 0.4  | 0    | -0.1  | -4.6   | 0.7    | L628M S638A L639D S695A F63W         |
| -2.4   | 2.2    | 1.4  | 0    | 0    | 1.2   | 0      | 0.7    | F63W                                 |
| -0.2   | -1.3   | -2.2 | 0.1  | 1.4  | -2.2  | -1.7   | -1.9   | Q637W D641F K96R                     |
| -1.6   | 10.3   | -2.1 | 0.1  | 1.1  | 7.8   | -1     | 0      | Q637W D641F K96R                     |
| -1.7   | -12.1  | 0.6  | 0.2  | 0.3  | -12.7 | -6.5   | 0.1    | Y645D M653A A98W                     |
| -3.2   | 27.5   | 0.8  | 0    | 0    | 25.2  | 0      | -0.4   | A98W                                 |
| -3.3   | -12    | 1.5  | 0.1  | -0.1 | -13.8 | 1.7    | 4.3    | Y645W M653T A98K                     |
| -1.1   | 28.3   | 0.9  | 0    | 0    | 28.1  | 0      | 0.8    | A98K                                 |
| -7.6   | 3.5    | 3.7  | 0.3  | -0.4 | -0.5  | -8.3   | -5.7   | L642V Y645W M653E I655W R6K A98W     |
| -3.9   | 27.5   | 1.6  | 0.1  | -0.1 | 25.2  | 0      | -5.9   | R6K A98W                             |
| -0.4   | -0.5   | -1   | 0    | -0.6 | -2.6  | -10.8  | -1.9   | M654A P681A R5Y                      |
| -0.8   | 3      | -1   | 0    | 0    | 1.2   | 0      | -1.9   | R5Y                                  |
| 1      | 2.5    | -3.3 | 0.2  | -0.8 | -0.4  | -6.7   | -3.1   | M654C P681K R5Y K9E                  |
| 1      | 2.8    | -3.6 | 0.2  | 0.4  | 0.8   | 0      | -3.1   | R5Y K9E                              |
| -1.9   | -0.3   | 0.1  | 0.3  | 0.1  | -1.6  | -8.2   | 0      | Q658E M670L D672H D678R S4W          |
| -0.7   | 2.5    | 0.1  | 0.5  | 0.2  | 2.6   | 0      | -0.7   | S4W                                  |
| -1.3   | -0.3   | 0.7  | -0.4 | -0.2 | -1.3  | -2.8   | -1.3   | Q658S M670W S4T                      |
| -0.4   | 111.1  | 0.1  | 0    | 0    | 110.8 | 0      | -1.3   | S4T                                  |
| -3.8   | 2.7    | 0.5  | -0.1 | 0.5  | -0.3  | -15.8  | -29.9  | I659V Q661H Y694T S695A I698G E60W   |
| -5.2   | 400.3  | 4.4  | 0.1  | 0.4  | 400   | 0      | -27.7  | E60W                                 |

Figure S.1. Binding titration of GoLoco V507M with wild type  $G\alpha_{i1}$ .

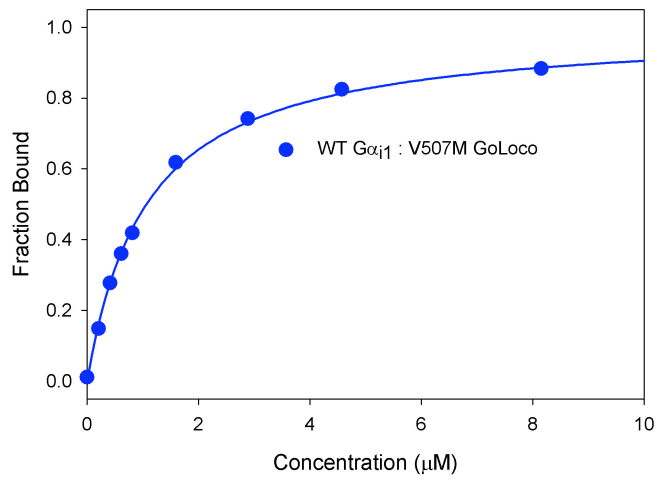

Figure S.2 Binding titrations for GoLoco L503K and  $G\alpha_{i1}$  K248E, S252L.

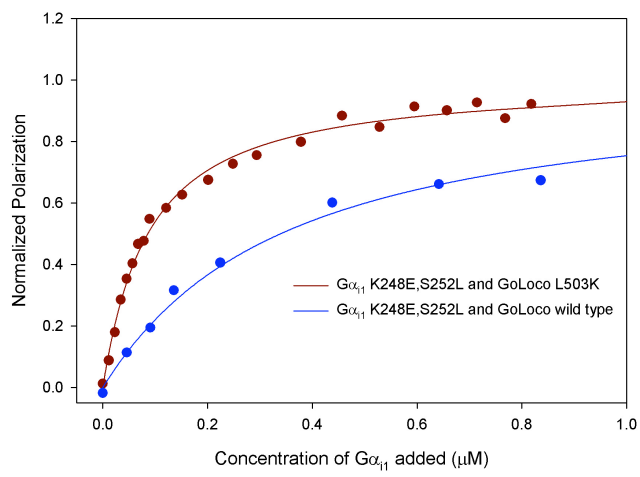

Figure S.3 Binding titration of GoLoco L519T with  $G\alpha_{i1}$  I78S, A111Q

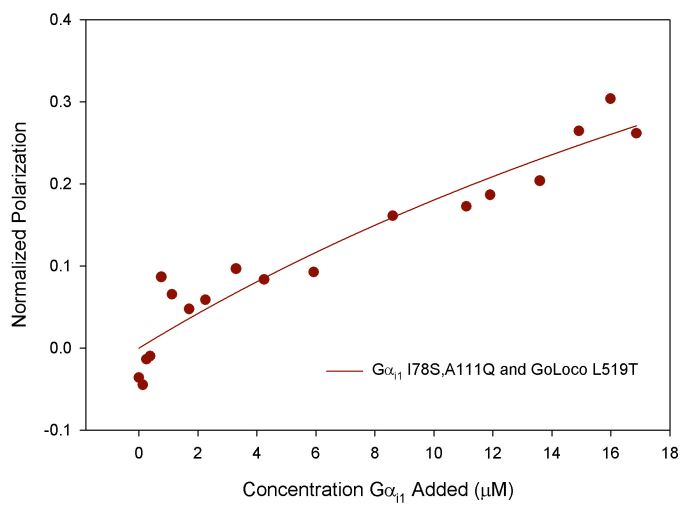

Figure S.4 Binding titrations of Ubch7 K64E and E6AP V634R

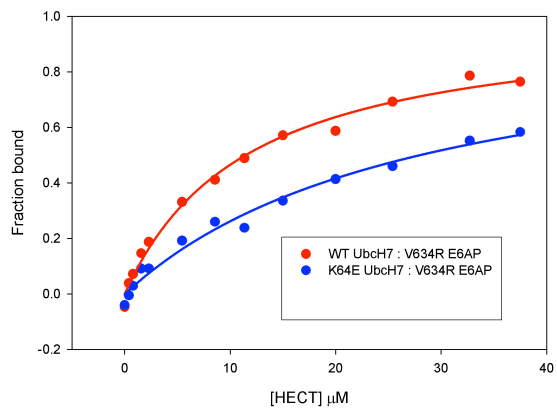

Figure S.5 Binding titrations of Ubch7 E60L and E6AP T662F Q661W. E6AP T662F Q661W is only soluble below a concentration of 10  $\mu\text{M}$ .

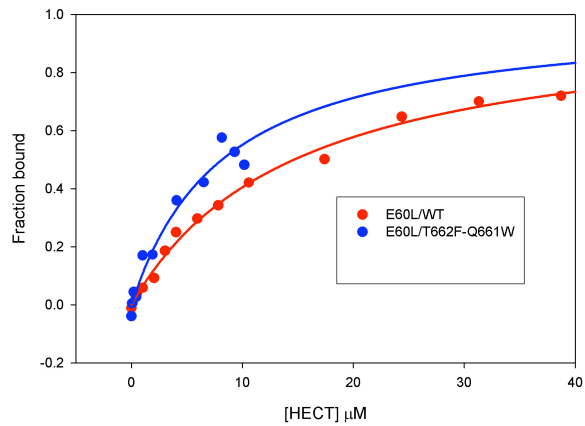

Figure S.6 Binding titrations of Ubch7 K96S, Ubch7 K96S, F63H, A98W and E6AP D641K

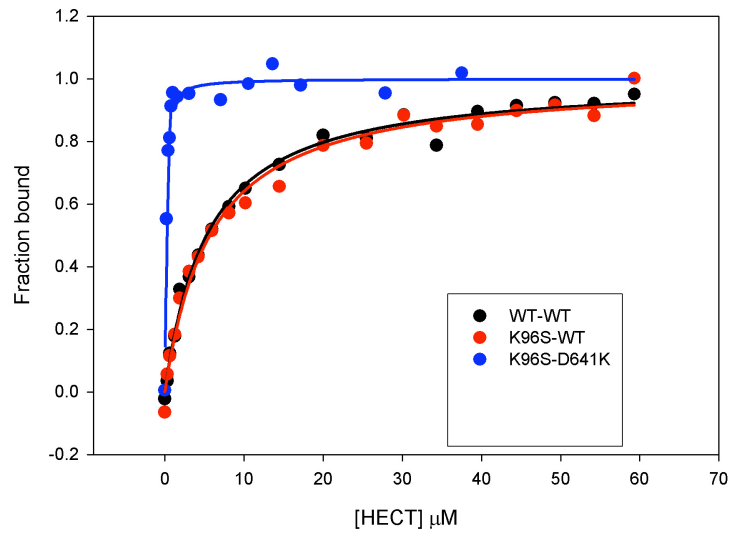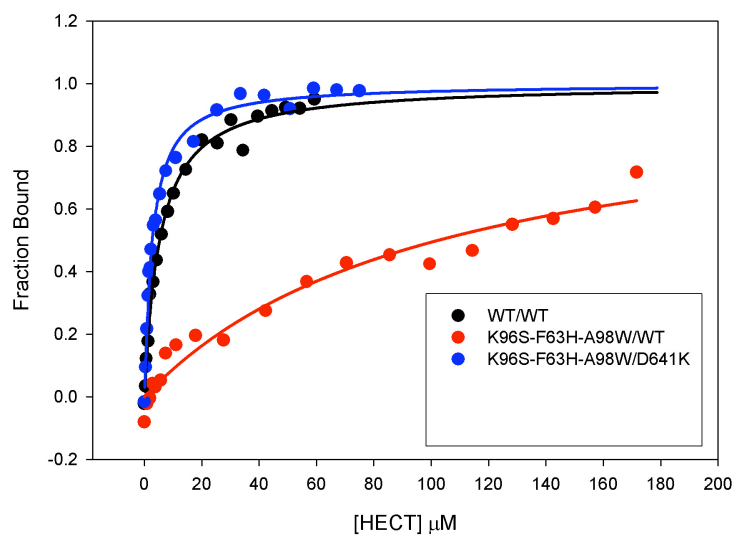

Figure S.7 Plots of calculated versus experimental  $\Delta\Delta G^0$  of binding. The top plot shows all the data from table 1, the bottom plot excludes the two points with large positive calculated values (from the repulsive energy score).

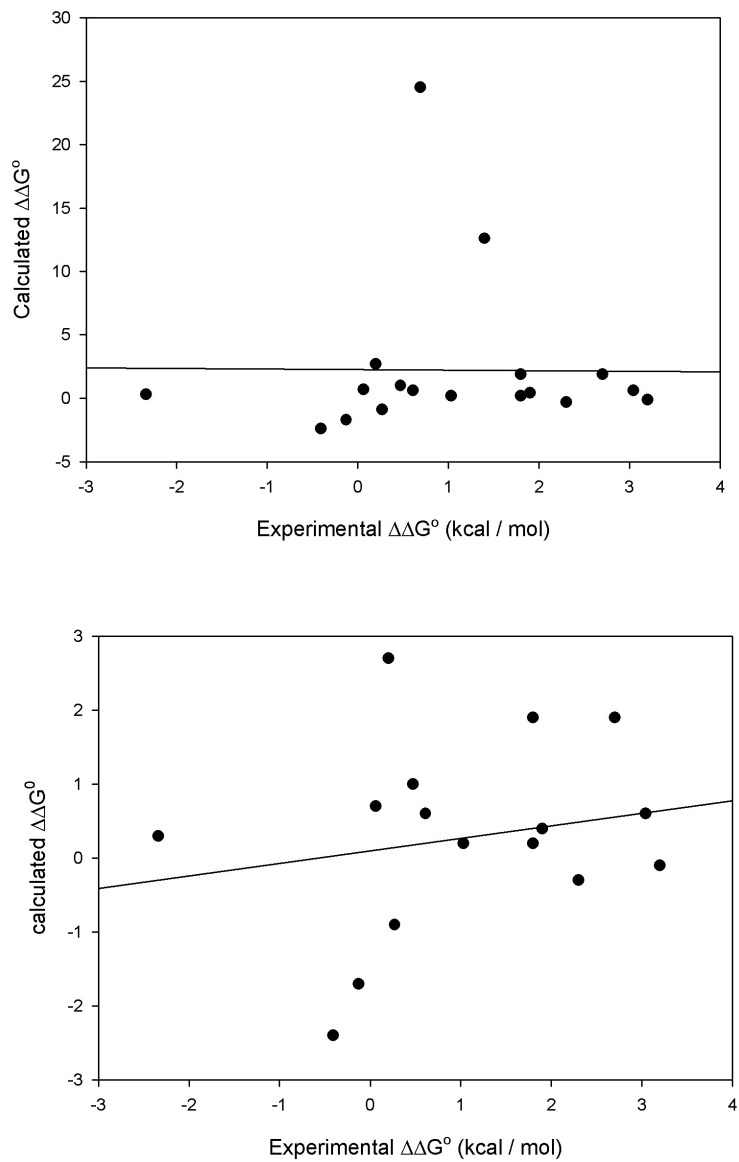

Supplement: NIHMS156018-supplement-Supp_Material.pdf [file NIHMS156018-supplement-Supp_Material.pdf]
